# Supplementary material for: Role of Residual Monomers in the Manifestation of (Cyto)toxicity by Polystyrene Microplastic Model Particles
Source: PubMed Central journal article supplement — Environ Sci Technol. 2023 Jun 26;57(27):9925–33. doi: 10.1021/acs.est.3c01134 (PMC10340104; doi:10.1021/acs.est.3c01134), 2023-06-26
Supplement: es3c01134_si_001.pdf [file es3c01134_si_001.pdf]

# Supporting information

## Role of Residual Monomers in the Manifestation of (Cyto)toxicity by Polystyrene Microplastic Model Particles

Yuanhu Zhang<sup>†</sup>, Tasmai Paul<sup>†</sup>, Julian Brehm<sup>‡</sup>, Matthias Völkl<sup>§</sup>, Valérie Jérôme<sup>§</sup>, Ruth Freitag<sup>§</sup>, Christian Laforsch<sup>‡</sup>, Andreas Greiner<sup>†\*</sup>

<sup>†</sup>Macromolecular Chemistry and Bavarian Polymer Institute, University of Bayreuth, 95440 Bayreuth, Germany

<sup>‡</sup>Animal Ecology I and BayCEER, University of Bayreuth, 95440 Bayreuth, Germany

<sup>§</sup>Process Biotechnology, University of Bayreuth, 95440 Bayreuth, Germany

\*Correspondence should be addressed to Andreas Greiner (greiner@uni-bayreuth.de)

This supporting information contains 20 pages, 7 figures, and 1 table.

- 14 **Figure S1.**  $^1\text{H}$ -NMR spectra of monomer styrene in the PS particles dispersion
- 15 **Figure S2.** SEM images of PS particles
- 16 **Figure S3.** Hydrodynamic diameter determined by DLS
- 17 **Figure S4.** The calibration curves of styrene and PS particles by UV-vis spectroscopy.
- 18 **Figure S5.** Representative UV-vis spectra of residual styrene and PS particles content detection  
19 by UV-vis spectroscopy
- 20 **Figure S6.** Residual styrene concentrations in PS particles dispersions being stored in 4 °C fridge  
21 over time
- 22 **Figure S7.** States of styrene in aqueous dispersions of PS particles and a proposed mechanism of  
23 styrene leaching
- 24 **Table S1.** Residual styrene contents at given PS concentrations of PS particles dispersions being  
25 stored in 4 °C fridge over time
- 26

## 27 **2.6. Methods**

28 **2.6.1. Validation of accuracy and precision of UV-Method.** To test the reliability of the new  
29 UV-Method, we have validated its accuracy and precision. For styrene calibration, styrene  
30 solutions in mixed solvents with concentrations of 1.5  $\mu\text{g/mL}$ , 2.5  $\mu\text{g/mL}$ , 3.5  $\mu\text{g/mL}$  were  
31 prepared. In the case of PS calibration, PS dispersions in Milli-Q water of 6  $\mu\text{g/mL}$ , 10  $\mu\text{g/mL}$ , 14  
32  $\mu\text{g/mL}$  were prepared. The recorded UV absorbance of those samples were used to calculate their  
33 concentrations according to the corresponding equations of calibration curves. The calculated  
34 concentrations were further used to obtain the accuracy and precision of the UV-Method of styrene  
35 (Figure S4E,  $96.8\pm 1.6\%$ ) and PS (Figure S4F,  $94.5\pm 2.0\%$ ).

36 **2.6.2. Diffusion of styrene in PS dispersions stored over time.** The styrene concentrations in the  
37 PS dispersions being stored in 4 °C fridge over time were detected by determining the residual  
38 styrene and PS concentration with the UV-Method. For styrene detection, 0.1 mL – 0.3 mL of PS  
39 dispersions were diluted; for PS detection, 0.1 mL of PS dispersions were diluted.

40 **2.6.3. NMR spectroscopy ( $^1\text{H-NMR}$ ).**  $^1\text{H-NMR}$  in  $\text{CDCl}_3$  with 64 measurement scans was  
41 performed to characterize PS, using a 300 MHz Bruker Ultrashield 300 spectrometer.

42 **2.6.4. Gel permeation chromatography (GPC).** To measure the molecular weight of PS, gel  
43 permeation chromatography (GPC) was performed using chloroform eluent on Agilent  
44 Technologies 1200 series machine. 20  $\mu\text{L}$  of 1 g/L of PS in chloroform solution was injected into  
45 GPC machine. The flow rate is 0.5 mL/min. The molecular weight was obtained according to the  
46 calibration of standard PS.

47 **2.6.5. Scanning electronic microscopy (SEM).** The size of PS particles was visualized by SEM  
48 FEI Quanta FEG 250 equipped with second electron detector. SEM images were recorded with  
49 conditions of voltage at 4.5 kV, spot 2.0. Before visualization, in-house synthesized PS particles

50 dispersion and standard PS model particles dispersion were diluted in methanol as solvent to a  
51 concentration of approximately 100  $\mu\text{g}/\text{mL}$ . Then one drop of the diluted dispersion was added on  
52 the glass substrate cemented on top of a carbon tape that was stuck on the metal carrier, followed  
53 by drying in an oven at 50 °C under vacuum for 24 hours. The dried samples were sputter-coated  
54 to 1.5 nm thickness of platinum with a Cressington sputter coater (120 s, 40 mA). For each sample,  
55 mean diameter was determined by measuring 100 PS beads with ImageJ software.

56 **2.6.6. Dynamic light scattering (DLS) and Zetasizer.** The hydrodynamic diameter and size  
57 distribution measurements were performed by dynamic light scattering (DLS) using  
58 ALV/DLS/SLS-5022GF system. The Helium-Neon laser was set at 633 nm and 22 milli Watt  
59 (mW). The signal was acquired at a detector angle of 90°, at 21 °C. The samples were prepared in  
60 water. The data were evaluated by a Dullware AfterALV software.

61 The zeta-potential was determined with a Malvern Zetasizer Nano-ZS ZEN3600, samples were  
62 diluted in Milli-Q water to 50  $\mu\text{g}/\text{mL}$ . The sample was transferred to a disposable folded capillary  
63 cell made of polystyrene latex (RI 1.59, absorption 0.01). Three measurements were taken for each  
64 sample at 25 °C, using the Smoluchowski model, and using dispersant viscosity as sample  
65 viscosity (water as dispersant, at 25 °C, viscosity 0.89 cP, RI 1.33, dielectric constant 78.5).

66 **2.6.7. Instrumental information of UV-vis measurement.** For quantification of styrene and PS  
67 in the PS particles dispersions, ultraviolet-visible spectroscopy (UV-vis) was conducted on a Jasco  
68 V-630 spectrophotometer equipped with light sources of Deuterium Lamp (D2 Lamp) and  
69 Tungsten Halogen Lamp (WI Lamp). All measurements were performed under the photometric  
70 mode of absorbance using both light sources of D2/WI with correction of the baseline of the blank  
71 solvent, which is methanol/water mixed solvent for styrene detection and water for PS. The UV-  
72 vis bandwidth is 1.5 nm.

73 To make sure the measurement is valid either for styrene or PS in the dispersions, a spectrum  
74 was recorded for each measurement, since styrene has an absorbance peak at 246 nm, and PS at  
75 280 nm, these peaks are close enough to interfere with each other either due to failure of sample  
76 preparation or the UV-vis machine itself. A spectrum could tell if interference happened, hence  
77 avoiding invalid data. Spectra for styrene calibration, spherical PS particles calibration (using SIP,  
78 diameter ~500 nm), and contents detection of styrene and PS particles were recorded in a  
79 wavenumber range of 500 – 200 nm, with a scan speed of 400 nm/min.

80 **2.6.8. Cell culture.** The L929 cells (CCL-1, ATCC) were maintained in Eagle's Minimum  
81 Essential Medium (EMEM, Lonza, Visp, Switzerland) cell culture medium supplemented with  
82 10% fetal calf serum (FCS, Sigma Aldrich, Taufkirchen, Germany), 1x Penicillin-Streptomycin  
83 mixture (Lonza, corresponding to 100  $\mu\text{g}/\text{mL}$  streptomycin and 100 IU/mL penicillin), and 4 mM  
84 L-glutamine (Lonza). The cell culture is referred to as MEM10. Cells were cultivated at 37 °C in  
85 a humidified 5% CO<sub>2</sub> atmosphere.

86 **2.6.9. MTT assays.** The in vitro cytotoxicity of styrene monomers and PS particles dispersions  
87 (SIPA, SHPA, MIPA, MHPA) were evaluated via tetrazolium dye assay (3-(4,5-dimethylthiazol-  
88 2-yl)-2,5-diphenyltetrazolium bromide (MTT) assay) according to the protocol ISO 10993-5<sup>1</sup>.  
89 Briefly, L929 cells were seeded at a density of  $1 \times 10^4$  cells per well in 96-well plates 24 hours  
90 before the experiment. On the experiment day, PS particles dispersions were diluted in MEM10 to  
91 concentrations ranging from 0.1  $\mu\text{g}/\text{mL}$  to 1.9 mg/mL, and styrene was pre-diluted in dimethyl  
92 sulfoxide (DMSO, Sigma Aldrich, Taufkirchen, Germany) and further diluted with MEM10 to  
93 final concentrations ranging from  $10^{-7}$   $\mu\text{g}/\text{mL}$  to  $10^3$   $\mu\text{g}/\text{mL}$ . As controls, samples containing equal  
94 volumes of water or DMSO instead of the PS dispersion or styrene were prepared. In all cases, the  
95 water and DMSO volume never exceed 10 and 1% of the total cultivation volume. The cell culture

96 medium in each plate was replaced by 100  $\mu$ L of diluted samples at different concentrations, and  
97 the cells were incubated for another 24 hours in the cell culture incubator (37 °C, 5% CO<sub>2</sub>, 95%  
98 humidity). Thereafter, the medium was aspirated, cells were washed with Dulbecco's phosphate-  
99 buffered saline (DPBS), and 50  $\mu$ L freshly prepared MTT reagent (1 mg/mL MTT (Alfa Aesar,  
100 Thermo Fisher (Kandel) GmbH, Kandel, Germany) in Minimum Essential Medium (MEM)  
101 without phenol red) was added to each well. After 2 hours of incubation, the supernatant was  
102 removed, and 100  $\mu$ L of isopropanol were added per well to dissolve the produced formazan  
103 crystals. After 5 min shaking at 600 rpm at room temperature, the absorbance at 570 nm (reference  
104 wavelength 680 nm) was measured using a TECAN GENios Pro plate reader (Tecan Austria  
105 GmbH, Gröding). The experiments were conducted in six biological replicates. Cells incubated  
106 with samples containing only water or DMSO were taken as 100% viability control. The cell  
107 viability was calculated from the ratio of  $A_{\text{treated}}/A_{\text{control}}$ , where  $A_{\text{treated}}$  and  $A_{\text{control}}$  represent the cells  
108 treated with and without PS particles dispersion or styrene, respectively. Curve fitting of styrene  
109 cytotoxicity was performed to determine the 50% lethal concentration LC<sub>50</sub>. However, the dose-  
110 response results revealed more than one point of inflection (i.e., multiphasic curve) preventing the  
111 fitting of the data with a standard Hill equation. Therefore, we used an algorithm, incorporated in  
112 the Dr-Fit freeware (<http://sourceforge.net/projects/drfit/>), which automatically generates and  
113 ranks dose-response models with varying degrees of multiphasic features<sup>2</sup>. Data were analyzed  
114 using the one-way analysis of variance (ANOVA) with a Tukey post hoc test to determine whether  
115 data groups differed significantly from each other. Differences were considered statistically  
116 significant for \*  $P < 0.05$ , \*\*  $P < 0.01$ , and \*\*\*  $P < 0.001$ .

117 **2.6.10. Acute immobilization test of daphnids.** The experiments were conducted using *D. magna*  
118 clone BL2.2 which originates from a small pond (Oud Meren) in Leuven, Belgium. This clone is

119 in culture since 1997 and has been used in several studies with microplastic at the Chair of Animal  
120 Ecology I at the University of Bayreuth<sup>3-5</sup>. Daphnids were cultured in M4 medium<sup>6</sup> at  $20 \pm 0.5$  °C  
121 and a 16 h : 8 h light: dark regime and fed *ad libitum* with the green algae *Acutodesmus obliquus*.

122 The experimental procedure was based on the OECD Guideline 202<sup>7</sup> for acute immobilization  
123 testing with *Daphnia* sp.. Due to the high number of daphnids required, the experiments were  
124 carried out in two runs, where each run had its own control group (n = 4). In the first run, the test  
125 was carried out for styrene treatments, and in the second run, for in-house synthesized PS particles  
126 dispersion (SIP, SHP) and standard PS model particles dispersion (MIP, MHP) treatments.

127 For the styrene treatment, a stock solution with M4 medium was prepared beforehand (10  
128  $\mu\text{g/mL}$ ) which was then diluted with M4 medium to achieve the selected concentrations. The  
129 chosen concentrations for the styrene treatment were 1  $\mu\text{g/mL}$ , 3  $\mu\text{g/mL}$ , 5  $\mu\text{g/mL}$ , 7  $\mu\text{g/mL}$ , and  
130 10  $\mu\text{g/mL}$ . For each concentration, four replicates with 10 mL each were poured into the wells of  
131 six-well culture plates. For all other treatments, the PS beads were dispensed directly from the  
132 stocks into the well plates containing 10 mL M4, each concentration with 4 replicates. Special care  
133 was taken to avoid absorption of the PS onto the pipette tips. For that, pipette tips were rinsed  
134 several times with the stock solution, then the outside was thoroughly cleaned mechanically (with  
135 a wipe), and the pipette tip was rinsed several times with the medium in the well. After each well,  
136 a new pipette tip was used. The chosen concentrations for the PS beads were 5  $\mu\text{g/mL}$ , 20  $\mu\text{g/mL}$ ,  
137 50  $\mu\text{g/mL}$ , 100  $\mu\text{g/mL}$ , and 300  $\mu\text{g/mL}$ .

138 Then age-synchronized (born within 24 h) third brood neonates were randomly placed in groups  
139 of five into the wells, each containing 10 mL M4 and the respective treatment concentration.  
140 According to the OECD Guideline 202, no food was added, and no medium exchange was done  
141 during the exposure (OECD 2004)<sup>7</sup>. In the first experimental run (styrene treatments), immobility

142 was checked after 24 h and 48 h. In the second experimental run (PS treatments), the test was  
143 prolonged to 96 h following the recommendation of Baumann *et al.*<sup>8</sup> Data normality and  
144 heteroscedasticity were checked using Shapiro-Wilk tests, Q-Q plots, and Levene's tests  
145 respectively. As assumptions for ANOVAs were not met, Kruskal-Wallis tests with post-hoc  
146 Dunn's tests with Bonferroni-Holm correction were calculated. Data analysis was conducted in  
147 R<sup>9</sup>, half-maximal effective concentrations (EC<sub>50</sub>) were calculated utilizing the package morse  
148 ("Modelling tools for Reproduction and Survival data in Ecotoxicology")<sup>10</sup>. Model evaluation was  
149 performed using the function "ppc" implemented in the package morse.

## 150 **2.7. Statistical analysis.**

151 Diameter values of PS particles were presented as mean ± SD. The quantitative equations of  
152 determining styrene and PS contents in the PS particles dispersions were performed with Origin  
153 2018 software with a linear fitting. For cell viability study, significant differences between  
154 treatments with synthesized and standard PS were showed by one-way ANOVA with a Tukey post  
155 hoc test. 50% lethal concentration (LC<sub>50</sub>) of styrene to L929 cell line was generated by Dr-Fit  
156 freeware (<http://sourceforge.net/projects/drfit/>)<sup>2</sup>. For acute immobilization test of *Daphnia*,  
157 significant differences between treatments with synthesized and standard PS were presented by a  
158 Kruskal-Wallis test followed by Dunn's test with Bonferroni-Holm correction. Its data analysis  
159 was performed in R<sup>9</sup>, half-maximal effective concentrations (EC<sub>50</sub>) were calculated utilizing the  
160 package morse ("Modelling tools for Reproduction and Survival data in Ecotoxicology")<sup>10</sup>. Model  
161 evaluation was performed using the function "ppc" implemented in the package morse. The p-  
162 value is noted in the manuscript and depicted in figure legends as \*  $P < 0.05$ , \*\*  $P < 0.01$ , \*\*\*  $P$   
163  $< 0.001$ .



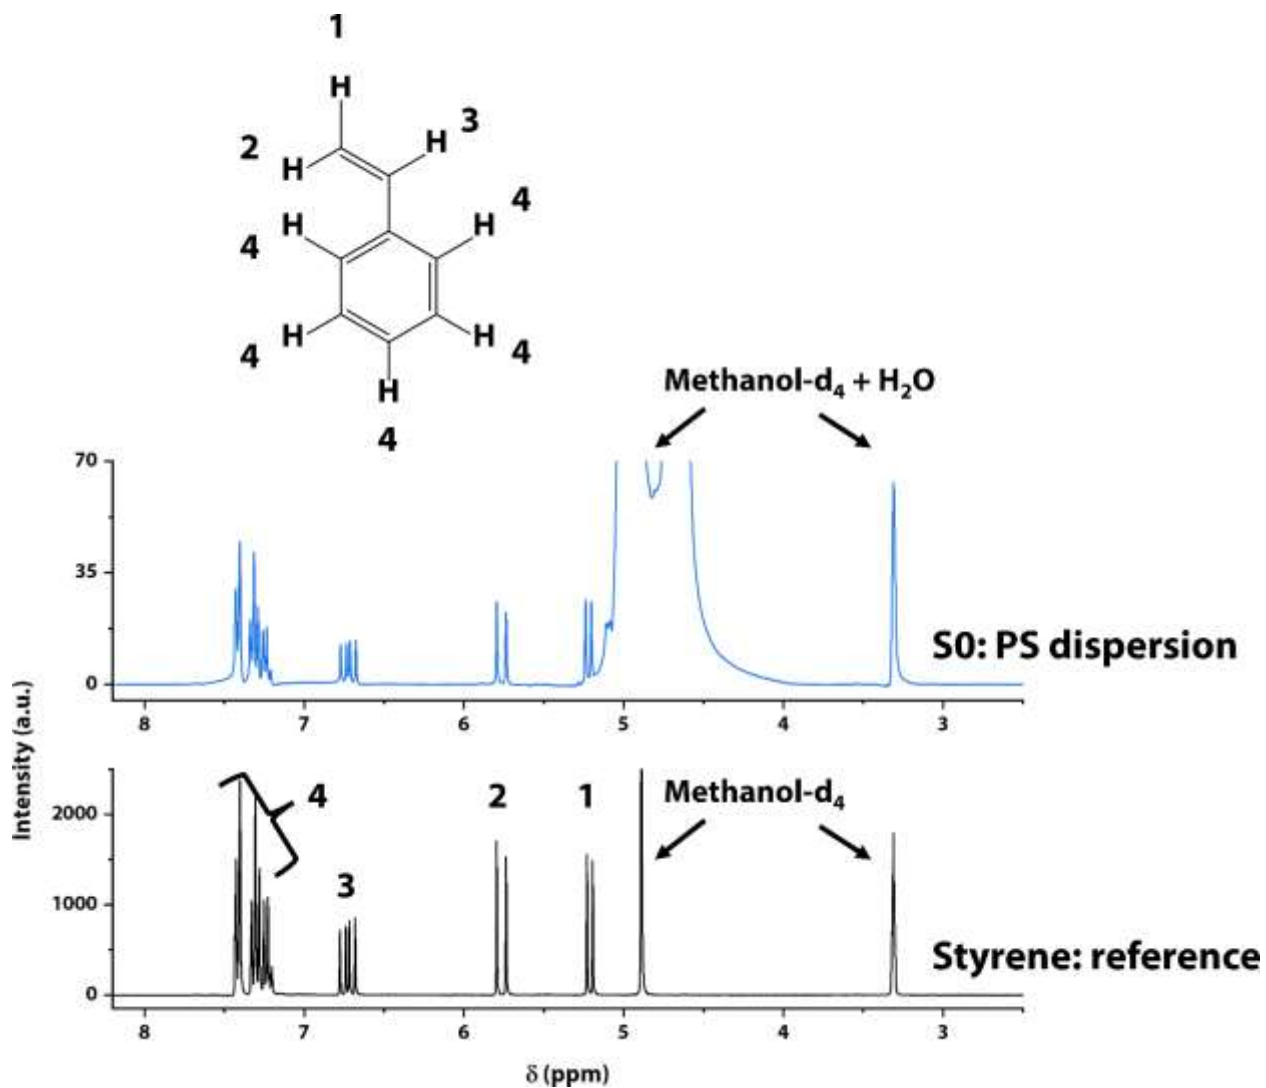

164  
 165 **Figure S1.** <sup>1</sup>H-NMR spectra of monomer styrene in the PS particles dispersion (S0, in-house  
 166 synthesized PS particles dispersion without purification). Methanol-d<sub>4</sub> was used as solvent. To  
 167 confirm signals of the unreacted styrene in the PS dispersion (blue curve), the NMR spectrum of  
 168 styrene as a reference (black curve) was recorded. In the reference spectrum, all signals were  
 169 assigned to the protons in styrene molecule.

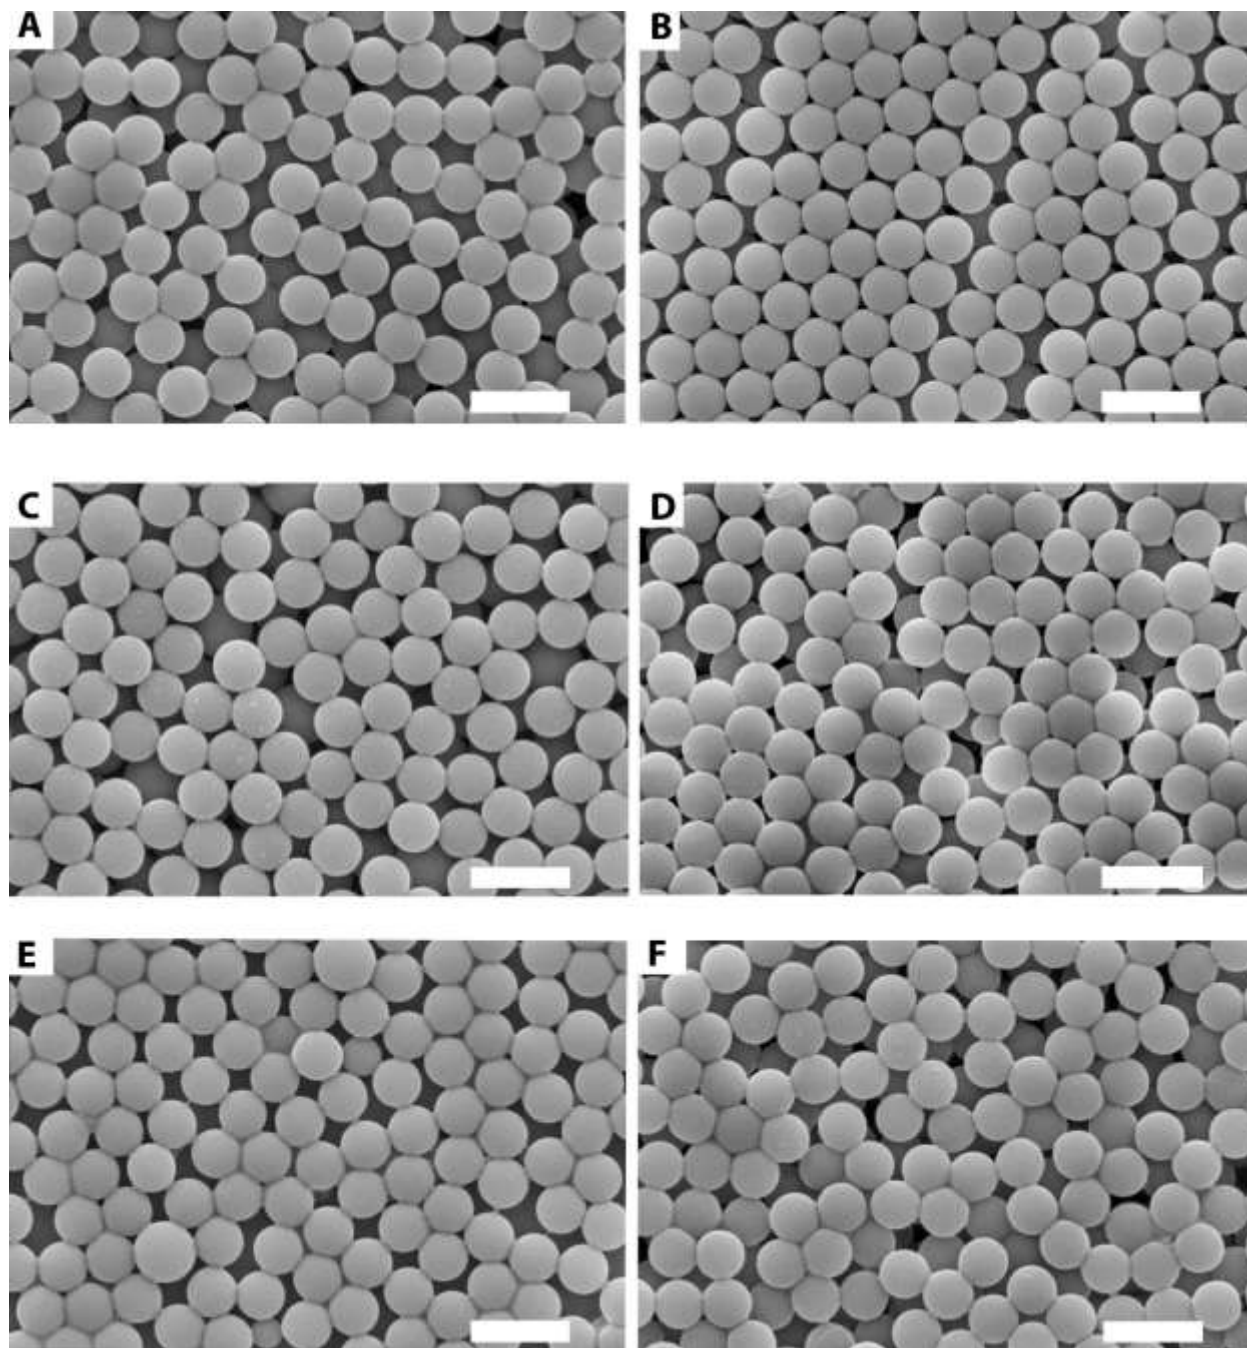

170  
 171 **Figure S2.** SEM images of PS particles. SIP,  $515 \pm 17$  nm; MIP,  $507 \pm 7$  nm; SEM images of SIP  
 172 and MIP are presented in **Figure 1**. (A) SIPA,  $510 \pm 28$  nm; (B) MIPA,  $502 \pm 6$  nm; (C) SHP,  $513$   
 173  $\pm 20$  nm; (D) MHP,  $509 \pm 7$  nm; (E) SHPA,  $509 \pm 24$  nm; (F) MHPA,  $508 \pm 10$  nm; mean diameter  
 174  $\pm$  SD by ImageJ,  $n = 100$ ; scale bar  $1 \mu\text{m}$ . MIP: standard PS model particles dispersion as received,  
 175 PS  $27400 \mu\text{g/mL}$ , styrene  $241.8 \mu\text{g/mL}$ , purity 99.13%; MIPA: MIP after autoclave, PS 30500

176  $\mu\text{g/mL}$ , styrene 65.4  $\mu\text{g/mL}$ , purity 99.79%; MHP: MIP after rapid dialysis, PS 17300  $\mu\text{g/mL}$ ,  
177 styrene 5.1  $\mu\text{g/mL}$ , purity 99.97%; MHPA: MHP after autoclave, PS 21030  $\mu\text{g/mL}$ , styrene 7.9  
178  $\mu\text{g/mL}$ , purity 99.96%; SIP: in-house synthesized PS particles dispersion after 40 days dialysis  
179 against Milli-Q water, PS 19360  $\mu\text{g/mL}$ , styrene 111.4  $\mu\text{g/mL}$ , purity 99.43%; SIPA: SIP after  
180 autoclave, PS 20780  $\mu\text{g/mL}$ , styrene 48.9  $\mu\text{g/mL}$ , purity 99.77%; SHP: SIP after rapid dialysis, PS  
181 15510  $\mu\text{g/mL}$ , styrene 4.3  $\mu\text{g/mL}$ , purity 99.97%; SHPA: SHP after autoclave, PS 17260  $\mu\text{g/mL}$ ,  
182 styrene 7.5  $\mu\text{g/mL}$ , purity 99.96%. The rapid dialysis of MIP and SIP is against distilled  
183 methanol/Milli-Q water (50/50 volumetric ratio) mixed solvents for 8 days then against Milli-Q  
184 water for 12 days.

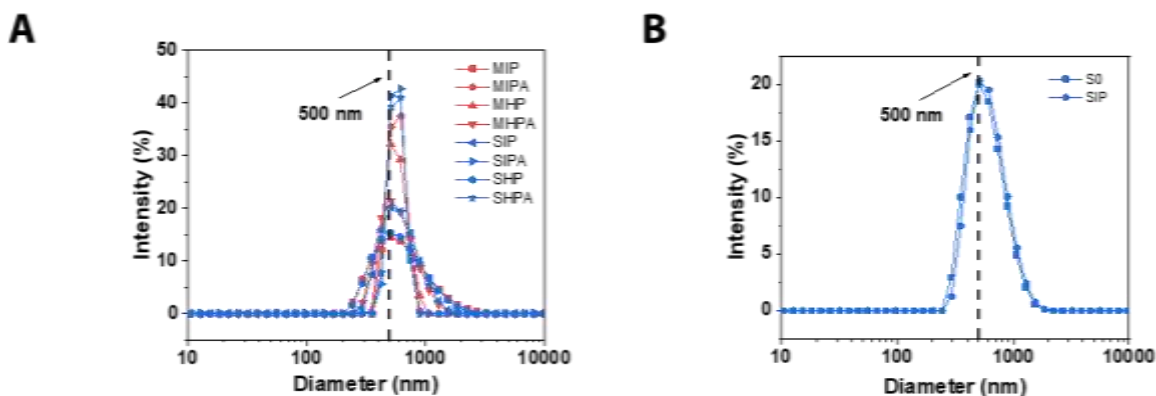

185

186 **Figure S3.** Hydrodynamic diameter determined by DLS. (A) size distribution of PS particles. (B)

187 comparison of the size and size distribution of the in-house synthesized PS particles dispersion

188 before and after dialysis against Milli-Q water. Dash line corresponds to 500 nm. The following is

189 the Z-average determined by DLS, presented as mean diameter  $\pm$  SD. MIP,  $555 \pm 157$  nm; MIPA,

190  $570 \pm 103$  nm; MHP,  $553 \pm 116$  nm; MHPA,  $553 \pm 174$  nm; SIP,  $578 \pm 173$  nm; SIPA,  $578 \pm 81$

191 nm; SHP,  $551 \pm 178$  nm; SHPA,  $575 \pm 89$  nm. MIP: standard PS model particles dispersion as

192 received, PS  $27400 \mu\text{g/mL}$ , styrene  $241.8 \mu\text{g/mL}$ , purity 99.13%; MIPA: MIP after autoclave, PS

193  $30500 \mu\text{g/mL}$ , styrene  $65.4 \mu\text{g/mL}$ , purity 99.79%; MHP: MIP after rapid dialysis, PS  $17300$

194  $\mu\text{g/mL}$ , styrene  $5.1 \mu\text{g/mL}$ , purity 99.97%; MHPA: MHP after autoclave, PS  $21030 \mu\text{g/mL}$ ,

195 styrene  $7.9 \mu\text{g/mL}$ , purity 99.96%; S0 corresponds to the in-house synthesized PS without

196 purification; SIP: in-house synthesized PS particles dispersion after 40 days dialysis against Milli-

197 Q water, PS  $19360 \mu\text{g/mL}$ , styrene  $111.4 \mu\text{g/mL}$ , purity 99.43%; SIPA: SIP after autoclave, PS

198  $20780 \mu\text{g/mL}$ , styrene  $48.9 \mu\text{g/mL}$ , purity 99.77%; SHP: SIP after rapid dialysis, PS  $15510 \mu\text{g/mL}$ ,

199 styrene  $4.3 \mu\text{g/mL}$ , purity 99.97%; SHPA: SHP after autoclave, PS  $17260 \mu\text{g/mL}$ , styrene  $7.5$

200  $\mu\text{g/mL}$ , purity 99.96%. The rapid dialysis of MIP and SIP is against distilled methanol/Milli-Q

201 water (50/50 volumetric ratio) mixed solvents for 8 days then against Milli-Q water for 12 days.

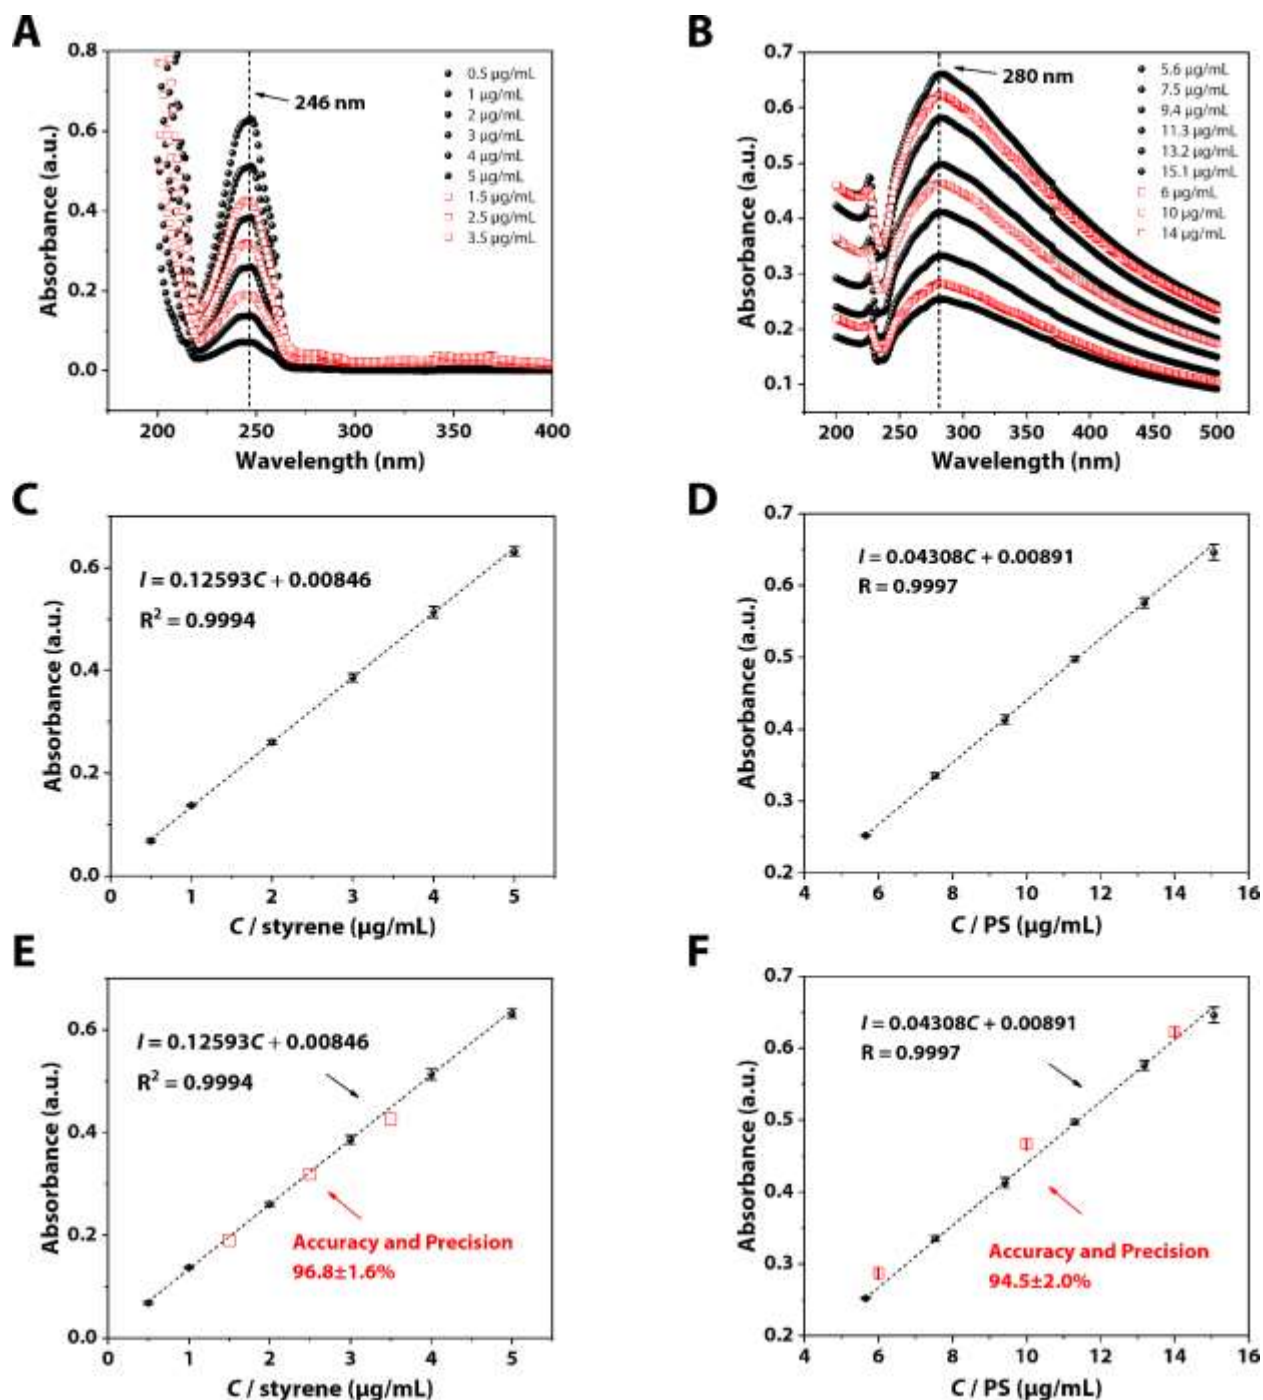

202

203 **Figure S4.** The calibration curves of styrene and PS particles by UV-vis spectroscopy (UV-vis  
 204 method). (A) the UV-vis spectra of styrene calibration (black solid circle) and accuracy and  
 205 precision determination of the calibration (red hollow square). For this, three independent solutions  
 206 for each concentration of styrene were prepared by dissolving styrene in the mixed solvent of

207 distilled methanol/Milli-Q water (90/10 volumetric ratio). The absorbance values of the  
208 measurement for the solutions were read at peak 246 nm<sup>11</sup>. (B) the UV-vis spectra of PS calibration  
209 (black solid circle) and accuracy and precision determination of the calibration (red hollow  
210 square). Three independent dispersions for each concentration of in-house synthesized PS particles  
211 dispersion (SIP) were prepared by diluting PS dispersion in Milli-Q water. Their absorbance values  
212 were read at peak 280 nm. (C) the scatter plot of styrene calibration by UV-vis,  $I_{246} = 0.12593C +$   
213  $0.00846$  ( $R^2 = 0.9994$ ). (D) the scatter plot of PS calibration by UV-vis,  $I_{280} = 0.04308C + 0.00891$   
214 ( $R^2 = 0.9997$ ). Styrene and PS calibration plots were linearly fitted with Origin software,  $I$  stands  
215 for absorbance intensity, and  $C$  for concentration. (E) accuracy and precision determination of  
216 styrene calibration curve, absorbance values were plotted in the calibration curve. The accuracy  
217 and precision is  $96.8 \pm 1.6\%$ . (F) accuracy and precision determination of PS calibration curve,  
218 absorbance values were plotted in the calibration curve. The accuracy and precision is  $94.5 \pm 2.0\%$ .

**A**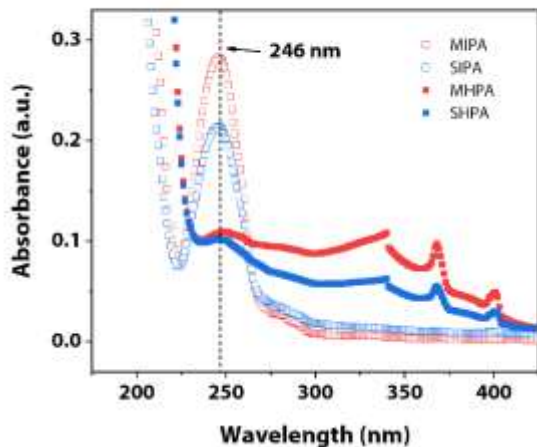**B**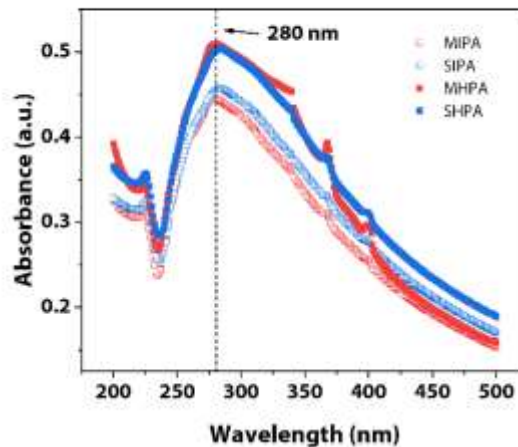

219  
220 **Figure S5.** Representative UV-vis spectra of residual styrene and PS particles content detection  
221 by UV-vis spectroscopy. (A) UV-vis spectra of styrene in PS particles dispersions. The PS  
222 particles dispersions were diluted to a range of styrene concentration that can be covered within  
223 the styrene calibration curve. (B) UV-vis spectra of PS in PS particles dispersions. The PS particles  
224 dispersions were diluted to a range of PS particles that can be covered within the PS calibration  
225 curve.  
226

**A**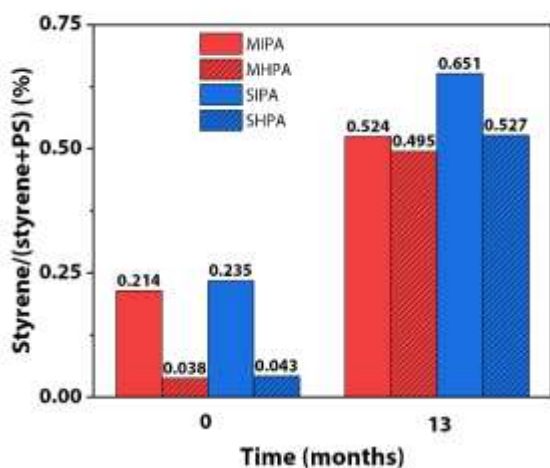**B**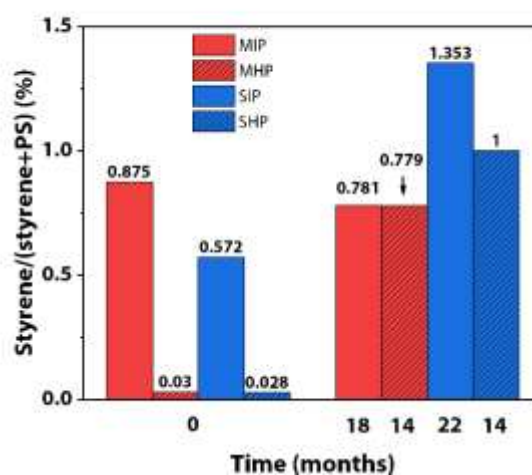

227

228 **Figure S6.** Residual styrene concentrations in PS particles dispersions being stored in 4 °C fridge  
 229 over time. Measurements were performed at room temperature. (A) residual styrene in PS  
 230 dispersions used in MTT assays. (B) residual styrene in PS dispersions used in acute  
 231 immobilization test of daphnids. Numbers in horizontal axis such as 13, 14 are the duration (unit:  
 232 months) of PS dispersions being stored when measurements were taken.



233 **Table S1.** Residual styrene contents at given PS concentrations of PS particles dispersions being  
 234 stored in 4 °C fridge over time. Measurements were performed at room temperature.

| Nomenclature        | PS ( $\mu\text{g/mL}$ ) | Styrene (%) | Residual styrene at varying PS ( $\mu\text{g/mL}$ ) |      |       |       |
|---------------------|-------------------------|-------------|-----------------------------------------------------|------|-------|-------|
|                     |                         |             | 300                                                 | 500  | 1000  | 1900  |
| MIPA                | 30500                   | 0.214       | 0.64                                                | 1.07 | 2.14  | 4.07  |
| MHPA                | 21030                   | 0.038       | 0.11                                                | 0.19 | 0.38  | 0.71  |
| SIPA                | 20780                   | 0.235       | 0.71                                                | 1.18 | 2.35  | 4.47  |
| SHPA                | 17260                   | 0.043       | 0.13                                                | 0.22 | 0.43  | 0.83  |
| MIPA <sup>13</sup>  | 31710                   | 0.524       | 1.58                                                | 2.63 | 5.27  | 10.01 |
| MHPA <sup>13</sup>  | 17840                   | 0.495       | 1.49                                                | 2.49 | 4.97  | 9.45  |
| SIPA <sup>13</sup>  | 19930                   | 0.651       | 1.97                                                | 3.28 | 6.55  | 12.45 |
| SHPA <sup>13*</sup> | 15810                   | 0.527       | 1.59                                                | 2.65 | 5.30  | 10.07 |
| MIP                 | 27400                   | 0.875       | 2.65                                                | 4.41 | 8.82  | 16.77 |
| MHP                 | 17300                   | 0.030       | 0.09                                                | 0.15 | 0.30  | 0.56  |
| SIP                 | 19360                   | 0.572       | 1.73                                                | 2.88 | 5.75  | 10.93 |
| SHP                 | 15510                   | 0.028       | 0.08                                                | 0.14 | 0.28  | 0.53  |
| MIP <sup>18</sup>   | 30250                   | 0.781       | 2.36                                                | 3.94 | 7.87  | 14.96 |
| MHP <sup>14</sup>   | 16280                   | 0.779       | 2.36                                                | 3.93 | 7.85  | 14.92 |
| SIP <sup>22</sup>   | 20200                   | 1.353       | 4.11                                                | 6.86 | 13.72 | 26.06 |
| SHP <sup>14*</sup>  | 15630                   | 1.000       | 3.03                                                | 5.05 | 10.10 | 19.19 |

235 \* The superscript of 13 or 14 in the nomenclature for instance SHPA<sup>13</sup> or SHP<sup>14</sup> is the duration  
 236 (unit: months) of SHPA or SHP being stored when measurements were taken.

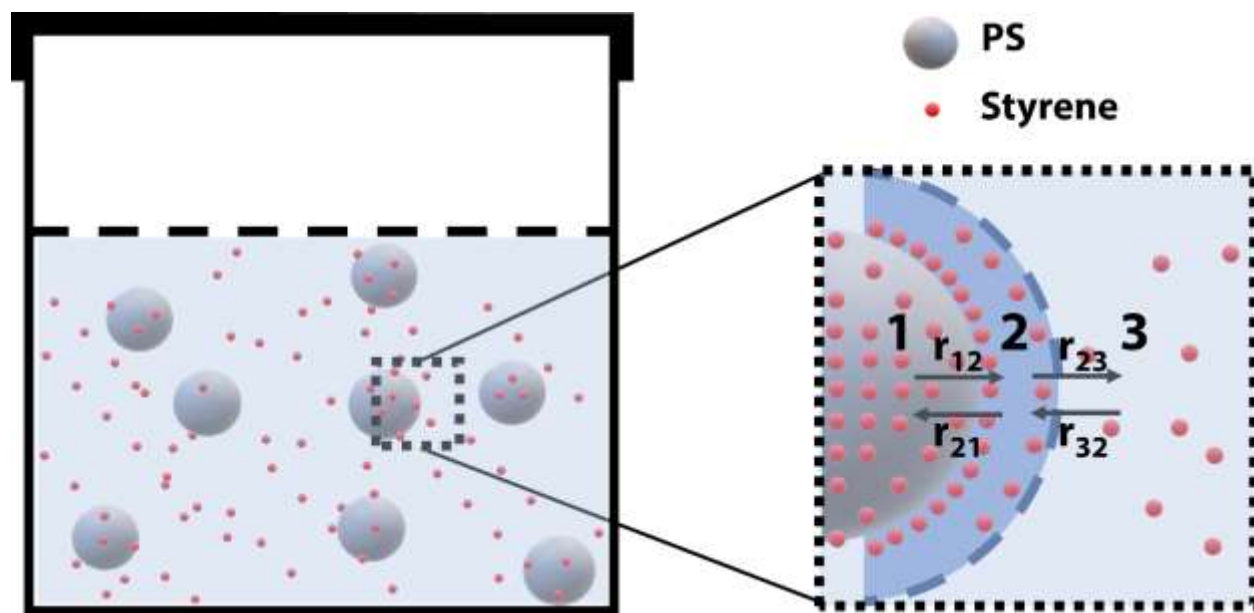

237  
 238 **Figure S7.** States of styrene in aqueous dispersions of PS particles and a proposed mechanism of  
 239 styrene leaching. In a single PS particle and its vicinity, Zone1 (Z1) is the internal area of the  
 240 particle, Zone2 (Z2) is the particle surface, Zone3 (Z3) is aqueous area out of Z2. If equilibrium  
 241 is reached, the boundary of Z2 and Z3 is represented with a virtual dash line from which the rate  
 242 of styrene diffusion to Z2 and to Z3 is equal, i.e.,  $r_{23} = r_{32}$ . Diffusion of styrene takes place  
 243 between Z1-Z2 and Z2-Z3. The “free” styrene, forming styrene-water complexes, are in Z3 and  
 244 the boundary of Z2-Z3, while the “trapped” styrene, forming PS-styrene complexes, are in Z1  
 245 and Z2. Styrene diffuses along two paths, from Z1 to Z2 and to Z3, it is leaching of styrene from  
 246 PS particles to water medium (abbreviated as  $L_{PS-H_2O}$ ); or from Z3 to Z2 and to Z1, it is  
 247 absorbing of styrene from water medium to PS particles (abbreviated as  $A_{H_2O-PS}$ ).  $L_{PS-H_2O}$  and  
 248  $A_{H_2O-PS}$  take place simultaneously. The overall outcome of diffusion, either  $L_{PS-H_2O}$  or  $A_{H_2O-PS}$ , is  
 249 governed by the rate of diffusion. If  $r_{12} > r_{21}$  and  $r_{23} > r_{32}$ , then it is  $L_{PS-H_2O}$ , or  $A_{H_2O-PS}$  *vice versa*.  
 250 The diffusion rate of styrene depends on the difference of styrene concentrations  $C_1, C_2, C_3$  in  
 251 different zones. The number of styrene molecules and the size of the PS particles in this diagram  
 252 do not represent the real ratio or concentration.

253 **References**

- 254 1. ISO, I. S. 10993–5: 2009 Biological evaluation of medical devices—part 5: tests for in vitro  
255 cytotoxicity. *International Organization for Standardization, Geneva* (2009).
- 256 2. Di Veroli, G. Y., Fornari, C., Goldlust, I., Mills, G., Koh, S. B., Bramhall, J. L., Richards, F.  
257 M. & Jodrell, D. I. An automated fitting procedure and software for dose-response curves with  
258 multiphasic features. *Scientific Reports* **5**, 14701 (2015).
- 259 3. Imhof, H. K., Rusek, J., Thiel, M., Wolinska, J. & Laforsch, C. Do microplastic particles affect  
260 *Daphnia magna* at the morphological, life history and molecular level? *PLOS ONE* **12**,  
261 e0187590 (2017).
- 262 4. Schrank, I., Trotter, B., Dummert, J., Scholz-Böttcher, B. M., Löder, M. G. J. & Laforsch, C.  
263 Effects of microplastic particles and leaching additive on the life history and morphology of  
264 *Daphnia magna*. *Environmental Pollution* **255**, 113233 (2019).
- 265 5. Trotter, B., Wilde, M. V., Brehm, J., Dafni, E., Aliu, A., Arnold, G. J., Thomas, F. & Laforsch,  
266 C. Long-term exposure of *Daphnia magna* to polystyrene microplastic (PS-MP) leads to  
267 alterations of the proteome, morphology and life-history. *Science of The Total Environment*  
268 **795**, 148822 (2021).
- 269 6. Elendt, B. P. & Bias, W. R. Trace nutrient deficiency in *Daphnia magna* cultured in standard  
270 medium for toxicity testing. Effects of the optimization of culture conditions on life history  
271 parameters of *D. magna*. *Water Research* **24**, 1157–1167 (1990).
- 272 7. *Test No. 202: Daphnia sp. Acute Immobilisation Test* (OECD, 2004).

- 273 8. Baumann, J., Sakka, Y., Bertrand, C., Köser, J. & Filser, J. Adaptation of the *Daphnia* sp. acute  
274 toxicity test: miniaturization and prolongation for the testing of nanomaterials. *Environmental*  
275 *Science and Pollution Research* **21**, 2201–2213 (2014).
- 276 9. Team, R. C. R: A language and environment for statistical computing (2013).
- 277 10. Baudrot, V., Charles, S. Morse: Modelling tools for reproduction and survival data in  
278 ecotoxicology. *R package version 3* (2018).
- 279 11. Rodebush, W. H. & Feldman, I. Ultraviolet Absorption Spectra of Organic Molecules. III.  
280 Mechanical Interference of Substituent Groups with Resonance Configurations. *Journal of the*  
281 *American Chemical Society* **68**, 896–899 (1946).
- 282
